# Supplementary material for: A novel computational model of human macular pigment optical density: correlation of macular pigment density with foveal structure
Source: Research Square preprint supplement (doi:10.21203/rs.3.rs-6440884/v1), 2025-07-23
Supplement: Supplementary file 1 [file 1efde23338ea0e3db9fdee24.docx]

**A New model of MPOD spatial profile**

Supplementary Material

**Table S1 Model mean parameter values for optimised data fits of MEG and M3G models to data ranges 0° - 2°and 0° - 5°.** Significant differences (p < 0.05) between pairs for each model are marked with *.

| MEG | | | | |  | M3G | | | |  |
| --- | --- | --- | --- | --- | --- | --- | --- | --- | --- | --- |
| Data range: | | 0° - 2° | 0° - 5° |  |  |  |  | 0° - 2° | 0° - 5° |  |
| A1 | mean | 0.5813 | 0.4406 | * |  | N1 | mean | 0.2504 | 0.2464 |  |
|  | sd | 0.2066 | 0.1601 |  |  |  | sd | 0.1485 | 0.1121 |  |
| A2 | mean | 0.1448 | 0.2226 | * |  | N2 | mean | 0.2778 | 0.3466 | * |
|  | sd | 0.1291 | 0.1639 |  |  |  | sd | 0.1328 | 0.1606 |  |
|  |  |  |  |  |  | N3 | mean | 0.1781 | 0.1781 |  |
|  |  |  |  |  |  |  | sd | 0.1414 | 0.1414 |  |
| p1 | mean | 0.6862 | 0.5057 | * |  | q1 | mean | 28.18 | 37.83 |  |
|  | sd | 0.2431 | 0.2065 |  |  |  | sd | 40.93 | 54.23 |  |
| p2 | mean | 5.7742 | 4.5571 |  |  | q2 | mean | 2.012 | 1.633 | * |
|  | sd | 3.8938 | 4.3094 |  |  |  | sd | 0.8024 | 1.016 |  |
|  |  |  |  |  |  | q3 | mean | 0.06183 | 0.06612 |  |
|  |  |  |  |  |  |  | sd | 0.2432 | 0.1523 |  |
|  |  |  |  |  |  | g1 | mean | 0.02553 | -0.04239 |  |
|  |  |  |  |  |  |  | sd | 0.06436 | 0.06210 |  |
| x2 | mean | 0.8875 | 0.5983 | * |  | g2 | mean | 0.5596 | 0.4941 |  |
|  | sd | 0.4323 | 0.3971 |  |  |  | sd | 0.2656 | 0.2868 |  |
|  |  |  |  |  |  | g2 | mean | 2.517 | 2.3259 |  |
|  |  |  |  |  |  |  | sd | 4.205 | 3.456 |  |

**Definitions of derived parameters**

For either function M = MEG or M3G, the following can be defined:

1. Areas under the curve for given eccentricity c

For this study, c = 0.2° and c = 5.0° [AOCM(0.2), AOCM(5.0)].

1. The half peak radius, RHPM, is obtained by numeric solution of:

**Statistical Analysis**

All analyses were carried out using STATISTICA software (Statsoft Inc., 2300 East 14th St, Tulsa, Ok, 74104, USA).

The Independent, X-variable data sets were MPOD, OCT and OCTA. The dependent, Y-variables data sets were M3G primary and derived parameters.

Factor analysis (FA) was applied to the Y variables and each set of X variables to determine the degree to which variables within a set were confounded. Analysis used principal components (PC) as the extraction method and initial solutions were unrotated (Hilton and Armstrong 2011). The output from such an analysis is a series of eigenvalues (‘latent roots’) which are proportional to the variation accounted for by each axis, the eigenvectors (‘latent vectors’) representing the ‘loadings’ (Factor Loading, FL), i.e., the spatial co-ordinates of each variable in relation to the factors. Several factors are extracted from the data each accounting for a specific proportion of the total variance, F1 for the greatest individual proportion of the variance and remaining factors (F2, F3… etc) for diminishing amounts of the remaining variance. Normally, two or three factors account for most of the variance within the data, the fourth and successive factors accounting for small and diminishing amounts of the residual variation, unless considerable heterogeneity is present.

To obtain the simplest model describing the relationship between the Y and X variables, a multiple regression analysis was carried out based on the results of the FA.

Y variables with greatest loading from each of the relevant factors (F1, F2 etc) for each data set was tested against the three groups of X variables using: (1) multiple regression (MR) which tested the significance of the regression slopes (β) and provides an equation expressing Y in relation to the X variables (Hilton and Armstrong 2011)and (2) stepwise multiple regression using the ‘forward’ method (SMR) which identified which X variables are significantly related to Y in order of their importance (Hilton and Armstrong 2011).

**Factor Analysis**

**1. Y variables: M3G primary and derived parameters**

(a) Five ‘factors’ were extracted accounting for 90% of the total variance: F1 (28%), F2 (25%), F3 (20%), F4 (11%) and F5 (6%) in diminishing order of importance.

(b) Factor loadings of the Y variables on these factors are shown in Table S2. Significant loadings (those with loadings > 0.7 are in bold.

**Table S2 Y-variable Factor Analysis**

| Variable | Factor Loading | | | | |
| --- | --- | --- | --- | --- | --- |
| Y | F1 | F2 | F3 | F4 | F5 |
| A1 | -0.5194 | 0.2413 | -0.3476 | -0.5124 | 0.1994 |
| A2 | -0.5414 | 0.5101 | 0.6063 | -0.0827 | -0.0523 |
| A3 | -0.7999 | -0.2273 | 0.3564 | 0.0858 | -0.1889 |
| p1 | 0.1977 | -0.2785 | 0.2618 | **0.7100** | -0.3682 |
| p2 | 0.5139 | 0.1845 | -0.1872 | 0.5696 | 0.4857 |
| p3 | **-0.7250** | -0.4166 | 0.2062 | -0.1680 | -0.1594 |
| x1 | 0.4073 | 0.5539 | -0.3098 | 0.3542 | -0.4871 |
| x2 | -0.4584 | -0.0448 | **-0.7455** | 0.4094 | 0.1966 |
| x3 | 0.6207 | 0.5529 | -0.2668 | 0.1643 | 0.1942 |
| A0 | -0.3947 | **0.8147** | 0.3226 | -0.0389 | 0.1703 |
| Aecc | -0.4776 | **0.7280** | 0.3937 | 0.2672 | 0.0980 |
| A0C02 | -0.3590 | **0.8683** | 0.2924 | 0.0176 | 0.1056 |
| A0C5 | -0.6007 | 0.6794 | 0.2415 | 0.2901 | 0.0706 |
| HH | **-0.7395** | -0.1704 | -0.2400 | 0.5617 | -0.0607 |
| dd1 | 0.1887 | **0.7628** | -0.4093 | -0.1009 | -0.4170 |
| dd2 | 0.0685 | **0.7153** | -0.3014 | -0.1745 | -0.2910 |
| dd3 | -0.0033 | 0.3452 | **-0.7780** | -0.4361 | -0.0386 |
| dd4 | -0.3163 | 0.1527 | **-0.8383** | 0.1847 | 0.0433 |
| dd5 | **-0.7615** | -0.2264 | -0.5784 | 0.1328 | 0.0171 |
| dd6 | **-0.8355** | -0.2823 | -0.4242 | -0.0498 | -0.0890 |
| % total variance: | 28% | 25% | 20% | 11% | 6% |

(c) Four groupings of variables are evident (F5 has no significant loadings)

F1: *p3, half height, dd5, dd6* (*dd5* and *dd6* have ‘best’ loadings)

F2: *A0, Aecc, A0C02, dd1, dd2* (*A0C02* best)

F3: *x2, dd3,dd4*, (*dd4* best)

(d) Fig S1 displays the factor loading in relation to F1 and F2and illustrates the close relationship between the variables loaded on F1.

**Fig S1**. Factor analysis of the Y (dependent, outcome) variables: A plot of loadings in relation to F1 and F2

**2. X variables: MPOD**

(a) Two factors extracted accounting for 91% of the total variance (F1 (78%), F2 (13%)

(b) Factor loadings of the MPOD variables are shown in Table S3.

**Table S3 X-variable Factor Analysis: MPOD**

| Variable |  | Factor Loading | |
| --- | --- | --- | --- |
| MPOD |  | F1 | F2 |
| OD rad0.2 | | **-0.8849** | 0.4548 |
| OD rad 1 |  | **-0.9285** | -0.2772 |
| OD rad 2 |  | **-0.8850** | -0.4030 |
| OD rad 3 |  | -0.6518 | -0.2800 |
| sumV0.2 |  | **-0.8682** | 0.4908 |
| sumV1 |  | **-0.9791** | 0.0230 |
| sumV2 |  | **-0.9505** | -0.2529 |
| sumV3 |  | **-0.9413** | -0.2758 |
| peak |  | **-0.8356** | 0.5331 |
| % total variance: | | 78% | 13% |

(c) There is a single group of confounded variables loading significantly on F1, i.e. all MPOD variables except *ODrad3*. No variables are significantly loaded on F2.

(d) All variables loaded on F1 provide similar predictions of Y, *sumV1* being ‘best’.

(e) Fig S2 displays the factor loading in relation to F1 and F2

**Fig S2**. Factor analysis of the X (independent, input) MPOD variables: A plot of loadings in relation to F1 and F2

**3. X variables: OCT**

(a) Two factors were extracted accounting for 79% of the total variance (F1 = 47%, F2 = 32%)

(b) Factor loadings of the OCT variables are shown in Table S4.

**Table S4 X-variable Factor Analysis: OCT**

| Variable |  | Factor Loading | |
| --- | --- | --- | --- |
| OCT |  | F1 | F2 |
| Av CRT |  | 0.0755 | **-0.8563** |
| fov th |  | **-0.7913** | -0.3916 |
| bwl ht |  | **0.9573** | -0.0564 |
| fov ang |  | **-0.8747** | 0.4358 |
| Pr |  | -0.0230 | **0.8481** |
| Fr |  | 0.6916 | 0.3030 |
| % total variance: | | 47% | 32% |

(c) Two groups of variables:

F1: *fov th, bwl ht, fov ang* (*bwl ht* ‘best’)

F2: *AvCRT, Pr* (both very similar loadings)

*Bwl ht* and one of *AvCRT* or *Pr* provide independent information of the X variables

(d) 2D display (fig 3) not especially revealing with all variables more or less scattered in the space

**Fig 3**. Factor analysis of the X (independent, input) OCT variables: A plot of loadings in relation to F1 and F2

**4. X variables: OCTA/FAZ**

(a) one factor (F1) extracted accounting for 97.6% of total variance.

(b) Factor loading are shown in Table S5

**Table S5 X-variable Factor Analysis: OCT**

| Variable |  | Factor loading |
| --- | --- | --- |
| OCTA/FAZ | | F1 |
| FAZ Feret | | **-0.9850** |
| FAZ(W+H)/2 | | **-0.9916** |
| Eq radius | | **-0.9879** |
| % total variance: | | 97.60% |

(c) All three variables have high loadings on F1 and are very similar

(d) Any single variable would be sufficient as a suitable dependent variable

(e) No plot possible as only one significant factor extracted.

**5. Factor Analysis: Overall conclusions**

(a) The analyses indicate which variables provide independent information (those loaded onto different factors) and those variables providing significant information (those with significant loadings on a factor, the higher the loading indicates greater significance). The analysis suggests a considerable degree of redundancy among these variables.

(b) The analysis suggests that there are four groups of Y variables in diminishing order of importance (F1 being the most important). The variables within each group are likely to be very similar in their responses. Most important independent outcome variables would be those with the highest loading within the group in diminishing order of importance *dd6* (F1), *AOCO2* (F2), *dd4* (F3), *p1* (F4).

(c) All the MPOD variables are loaded on F1 and provide similar predictions of Y, *sumV1* being ‘best’. However, the loadings of all these variables are very similar and any of them or any combination of them likely to be a good predictor. This is to be expected and confirms given that all the MPOD variables represent aspects of the MPOD distribution.

(d) The analysis of the OCT variables extracts two groups of independent variables, *bwl* or one of *AvCRT* and *Pr* are likely to be a good predictor. As the foveal bowl height and average central retinal thickness measure similar features of the central fovea, foveal pit radius was (Pr) was chosen for regression analysis.

(e) All three OCTA/FAZ variables show high loadings on F1. They are very similar predictors of Y and any one of them alone or in combination could be used. Foveal avascular zone equivalent radius (FAZer) was chosen for further analysis in keeping with previous studies (Balaratnasingam, Chae et al. 2015).

**Multiple regression (MR) and stepwise multiple regression (SMR) analyses of selected Y and X variables based on FA**

1. *Objective*: Based on the results of the FA, to test a series of four dependent (Y) variables, *p1, AOCO2, dd4, dd6* against three X variables: *bwl ht, Pr, eq radius*.

2. Results (Table S6). MR & SMR analysis reduces to a simple message: the best predicted outcome (Y) is *dd6* using *eq radius* ,*bwl ht* and *Pr* as predictors. All other variables are redundant, not significant, or not well predicted.

‘Best’ model is: *dd6* = 0.605*eq radius* + 0.426*bwl ht* + 0.19*Pr*

**Table S6**. Summary of multiple regression (MR) and stepwise multiple regression (SMR) analyses of FA-selected variables

|  | FA | MR | | | SMR | |
| --- | --- | --- | --- | --- | --- | --- |
| Y | FA grouping | R2 | X | β | Selected variables | R2 (%) |
| dd6 | F1 | 81% | eq radius | 0.603 | eq radius (65%) | 65% |
|  |  |  | bwl ht | 0.426 | bwl ht | 13% |
|  |  |  | Pr | 0.19 | Pr | 3% |
|  |  |  |  |  |  |  |
| AOCO2 | F2 | 24% | eq radius | -0.54 | eq radius | 22% |
|  |  |  | Pr | 0.176 |  |  |
|  |  |  |  |  |  |  |
| dd4 | F3 | 5% | None |  | None |  |
|  |  |  |  |  |  |  |
| p1 | F4 | 7% | bwl ht | 0.237 | bwl ht | 7% |

**Supplementary Material References**

Balaratnasingam, C., B. Chae, M. H. Remmer, E. Gomez, M. Suzuki, M. Engelbert and R. F. Spaide (2015). "The Spatial Profile of Macular Pigments Is Related to the Topological Characteristics of the Foveal Avascular Zone." Investigative Ophthalmology & Visual Science **56**(13): 7859-7865.

Hilton, A. and R. A. Armstrong (2011). "Statnote 24: Multiple regression." Microbiologist **12**(1): 40 - 43.

Hilton, A. and R. A. Armstrong (2011). "Statnote 25: Stepwise multiple regression." Microbiologist **12**(2): 38 - 39.

Hilton, A. and R. A. Armstrong (2011). "Statnote 27: Principal components analysis (PCA)." Microbiologist **12**(4): 37 - 40.
